# Supplementary material
Source: PubMed Central journal article supplement (PMC6445042)
Supplement: ry181113suppa1.pdf [file ry181113suppa1.pdf]

## Appendix E1

### Section 1. Preparation of Radiomic Features

#### A. Preparation of Radiomic Features Extracted from Breast Tumor

Our computerized breast lesion analysis methods for mammography involve several steps. The first step is breast lesion segmentation. The localized breast lesion is automatically segmented from the background parenchyma using a radial gradient index (RGI) segmentation method (36) to generate the initial breast lesion contour which is relatively close to the actual margin. Then an active contour method (20) based on level sets is applied on the initial segmentation to generate the final segmentation. Next, a total of 32 radiomic features are automatically extracted. These descriptors can be divided into six categories. Spiculation features include a radial-edge gradient analysis to derive two spiculation related features, the “Normalized Radial gradient,” and “FWHM” (full width at half maximum) (1,37). The spiculation measure is calculated on four neighborhood regions, including grown region, margin, encompassing region, and surrounding periphery. Radial gradient index (21), margin sharpness measure (21), density related mass features (21), size, shape features (38) and textural features based on gray level co-occurrence (GLCM) are also calculated (22,39,40). Table E1 gives the name, brief description, and category of all the radiomic features extracted from breast mass lesion.

#### B. Preparation of Radiomic Features Extracted from Parenchyma Stroma

The computerized parenchymal texture analysis method involves several steps. The first step is regions-of-interest (ROIs) selection. ROIs of 256 by 256 pixels are manually selected from the central breast region immediately behind the nipple of craniocaudal (CC) projection of mammographic view, since that region usually includes the dense parts of the breast. ROIs are selected such that regions along the skin line, which contains subcutaneous fat, are not included. Our prior studies demonstrated the benefit of the ROI behind the nipple in assessing risk of cancer, and its improved performance as compared with ROIs throughout the breast (24). We believe, use of the entire breast area is ideal for evaluating the percent breast density. However, the results from our study best assess the texture of dense regions, which usually occurs behind the nipple as opposed to percent dense. The detailed explanation regarding ROI extraction has been reported elsewhere (24). Then, quantitative radiomic texture feature extractions are performed on each ROI to characterize the mammographic parenchymal patterns. A total of 45 texture features are calculated from each individual ROIs to characterize the local composition, contrast, homogeneity, and coarseness of breast parenchyma (39–43). These features are based on (a) gray-level histogram analysis to characterize the local tissue composition, (b) fractal analysis, including box-counting and Minkowski methods, (c) edge-frequency analysis, (d) Fourier analysis, including root mean square variation, first moment of power spectrum, and power law beta from power spectral analysis, (e) textural analysis using neighborhood gray-tone difference matrix and gray-level co-occurrence matrix to characterize the spatial relationship among gray levels. Table E2 gives the name, brief description, and category of all radiomic features extracted from the breast parenchyma stroma.

## References

36. Kupinski MA, Giger ML. Automated seeded lesion segmentation on digital mammograms. IEEE Trans Med Imaging 1998;17(4):510–517 .
- 37 Giger ML, Vyborny CJ, Schmidt RA. Computerized characterization of mammographic masses: analysis of spiculation. Cancer Lett 1994;77(2-3):201–211 .
38. Beutel J, ed. Handbook of medical imaging. Bellingham, Wash: SPIE Press, 2000.
39. Haralick RM, Shanmugam K, Dinstein I. Textural Features for Image Classification. IEEE Trans Syst Man Cybern 1973;SMC-3(6):610–621 .
40. Sonka M, Hlavac V, Boyle R. Image processing, analysis, and machine vision. 3rd ed. Toronto: Thompson Learning, 2008.
41. Li H, Giger ML, Olopade OI, Chinander MR. Power spectral analysis of mammographic parenchymal patterns for breast cancer risk assessment. J Digit Imaging 2008;21(2):145–152 .
42. Li H, Giger ML, Olopade OI, Lan L. Fractal analysis of mammographic parenchymal patterns in breast cancer risk assessment. Acad Radiol 2007;14(5):513–521 .
43. Li H, Giger ML, Olopade OI, Margolis A, Lan L, Chinander MR. Computerized texture analysis of mammographic parenchymal patterns of digitized mammograms. Acad Radiol 2005;12(7):863–873 .

**Table E1: List of names, descriptions, and categories of all 32 radiomic features extracted from the breast lesion.**

| Category                     | Name                                               | Description                                                                                                       |
|------------------------------|----------------------------------------------------|-------------------------------------------------------------------------------------------------------------------|
| <b>Spiculation features</b>  | FWHM (grown region)                                | Measure of the shape of the normalized cumulated edge-gradient distribution within grown lesion region            |
|                              | Normalized radial gradient (grown region)          | Quantitative measure of the spiculation of a mass lesion within grow lesion region                                |
|                              | FWHM (margin)                                      | Measure of the shape of the normalized cumulated edge-gradient distribution along lesion margin                   |
|                              | Normalized radial gradient (margin)                | Quantitative measure of the spiculation of a mass lesion along its margin                                         |
|                              | FWHM (encompassing region)                         | Measure of the shape of the normalized cumulated edge-gradient distribution within encompassing region            |
|                              | Normalized radial gradient (encompassing region)   | Quantitative measure of the spiculation of a mass lesion within encompassing region                               |
|                              | FWHM (surrounding periphery)                       | Measure of the shape of the normalized cumulated edge-gradient distribution within surrounding periphery          |
|                              | Normalized radial gradient (surrounding periphery) | Quantitative measure of the marginal spiculation of a mass lesion within surrounding periphery                    |
| <b>Radial gradient index</b> | Average radial gradient                            | Average radial gradient within the encompassing region                                                            |
| <b>Margin sharpness</b>      | Margin sharpness                                   | Quantitative measure of the lesion margin                                                                         |
| <b>Density features</b>      | Average gray value                                 | Average the gray-level values of each pixel within the grown region of a mass                                     |
|                              | Contrast1                                          | Difference between the average gray level of the grown region and the 20% threshold of the surrounding fatty area |
|                              | Contrast2                                          | Difference between 95% threshold of the grown region and the 20% threshold of the surrounding fatty area          |
|                              | Standard deviation of gray level                   | Standard deviation of gray value within a mass region to quantify the heterogeneity of the lesion                 |
| <b>Size</b>                  | Effective diameter                                 | Diameter of a circle with the same area as the lesion                                                             |
| <b>Shape</b>                 | Circularity                                        | Ratio of area of grown potential mass within effective circle over area of potential mass                         |

|                                       |                                             |                                                                                                   |
|---------------------------------------|---------------------------------------------|---------------------------------------------------------------------------------------------------|
|                                       | Irregularity                                | Deviation of the perimeter of the mass lesion from the perimeter of a circle with equivalent area |
|                                       | Compactness                                 | Ratio of area of grown region over perimeter of grown region squared                              |
| <b>Texture features based on GLCM</b> | Contrast (GLCM)                             | Measure of local image variations                                                                 |
|                                       | Correlation (GLCM)                          | Measure of image linearity                                                                        |
|                                       | Difference entropy (GLCM)                   | Measure of the randomness of the difference of neighboring pixels' gray-levels                    |
|                                       | Difference variance (GLCM)                  | Measure of variations of difference of gray-levels between pixel-pairs                            |
|                                       | Energy (Angular second moment)              | Measure of image homogeneity                                                                      |
|                                       | Entropy                                     | Measure of the randomness of the gray-levels                                                      |
|                                       | Inverse difference moment                   | Measure of the image homogeneity                                                                  |
|                                       | Information measure of correlation 1 (IMC1) | Measure of nonlinear gray-level dependence                                                        |
|                                       | Information measure of correlation 2 (IMC2) | Measure of nonlinear gray-level dependence                                                        |
|                                       | Maximum correlation coefficient (MCC)       | Measure of nonlinear gray-level dependence                                                        |
|                                       | Sum average                                 | Measure of the overall image brightness                                                           |
|                                       | Sum entropy                                 | Measure of the randomness of the sum of gray-levels of neighboring pixels                         |
|                                       | Sum variance                                | Measure of the spread in the sum of the gray-levels of pixel-pairs distribution                   |
|                                       | Sum of squares (variance)                   | Measure of the spread in the gray-level distribution                                              |

Note.—FWHM = Full Width at Half Maximum, GLCM: Gray-Level Co-occurrence Matrix.

**Table E2: List of names, descriptions, and categories of all 45 radiomic features extracted from the parenchyma stroma.**

| Category                                                     | Name             | Description                                                                          |
|--------------------------------------------------------------|------------------|--------------------------------------------------------------------------------------|
| <b>Features based on gray-level and gray-level histogram</b> | Average          | Average gray value within region of interest                                         |
|                                                              | 95% threshold    | gray level threshold yielding 95% of the area under the histogram of the region      |
|                                                              | 5% threshold     | gray level threshold yielding 5% of the area under the histogram of the region       |
|                                                              | Balance1         | Ratio of (95% threshold-Average) to (Average-5% threshold)                           |
|                                                              | 70% threshold    | gray level threshold yielding 70% of the area under the histogram of the region      |
|                                                              | 30% threshold    | gray level threshold yielding 30% of the area under the histogram of the region      |
|                                                              | Balance2         | Ratio of (70% threshold-Average) to (Average-30% threshold)                          |
|                                                              | Skewness         | The denseness measure used to characterize local tissue composition                  |
| <b>Texture features based on NGTDM</b>                       | Coarseness       | Measure of image coarseness calculated from neighborhood gray-tone difference matrix |
|                                                              | Contrast         | Contrast measure calculated from neighborhood gray-tone difference matrix            |
| <b>Fractal dimension based on box-counting method</b>        | $D_{BC}$ [1–6]   | Fractal dimension estimated based on box-counting method                             |
| <b>Fractal dimension based on Minkowski method</b>           | $D_M$            | Fractal dimension estimated based on Minkowski method                                |
| <b>Power law beta</b>                                        | Beta [1–8]       | Exponent beta estimated based on power law spectrum analysis                         |
| <b>Feature based on edge frequency</b>                       | MeanEdgeGradient | Average of edge gradient                                                             |
|                                                              | MaxEdgeGradient  | Maximum edge gradient                                                                |
|                                                              | MinEdgeGradient  | Minimum edge gradient                                                                |

|                                                     |                                             |                                                                                 |
|-----------------------------------------------------|---------------------------------------------|---------------------------------------------------------------------------------|
|                                                     | StdDevEdgeGradient                          | Standard deviation of edge gradient                                             |
| <b>Features based on Fourier transform analysis</b> | RMS                                         | Root-mean-square variation (RMS) based on Fourier transform analysis            |
|                                                     | FMP                                         | First moment of power spectrum (FMP) based on Fourier transform analysis        |
| <b>Texture features based on GLCM</b>               | Contrast (GLCM)                             | Measure of local image variations                                               |
|                                                     | Correlation (GLCM)                          | Measure of image linearity                                                      |
|                                                     | Difference entropy (GLCM)                   | Measure of the randomness of the difference of neighboring pixels' gray-levels  |
|                                                     | Difference variance (GLCM)                  | Measure of variations of difference of gray-levels between pixel-pairs          |
|                                                     | Energy (Angular second moment)              | Measure of image homogeneity                                                    |
|                                                     | Entropy                                     | Measure of the randomness of the gray-levels                                    |
|                                                     | Inverse difference moment                   | Measure of the image homogeneity                                                |
|                                                     | Information measure of correlation 1 (IMC1) | Measure of nonlinear gray-level dependence                                      |
|                                                     | Information measure of correlation 2 (IMC2) | Measure of nonlinear gray-level dependence                                      |
|                                                     | Maximum correlation coefficient (MCC)       | Measure of nonlinear gray-level dependence                                      |
|                                                     | Sum average                                 | Measure of the overall image brightness                                         |
|                                                     | Sum entropy                                 | Measure of the randomness of the sum of gray-levels of neighboring pixels       |
|                                                     | Sum variance                                | Measure of the spread in the sum of the gray-levels of pixel-pairs distribution |
|                                                     | Sum of squares (Variance)                   | Measure of the spread in the gray-level distribution                            |

Note.—NGTDM = Neighborhood Gray-Tone Difference Matrix, GLCM = Gray-Level Co-occurrence Matrix, RMS = Root Mean Square, FMP = First Moment of Power Spectrum.

**Table E3: Classification performance in the task of distinguishing between malignant and benign lesions using tumor features and combined tumor and parenchyma texture features across different categories of patients.**

| Cases                        | Number of tumors | Benign | Malignant | AUC (tumor features) | AUC (tumor & parenchyma features) |
|------------------------------|------------------|--------|-----------|----------------------|-----------------------------------|
| <b>All</b>                   | 182              | 76     | 106       | 0.79 ± 0.03          | 0.84 ± 0.03                       |
| <b>BI-RADS score</b>         |                  |        |           |                      |                                   |
| BI-RADS 4                    | 99               | 69     | 30        | 0.77 ± 0.05          | 0.81 ± 0.05                       |
| BI-RADS 5                    | 83               | 7      | 76        | 0.76 ± 0.14          | 0.81 ± 0.10                       |
| <b>Age</b>                   |                  |        |           |                      |                                   |
| <50                          | 62               | 36     | 26        | 0.87 ± 0.05          | 0.88 ± 0.05                       |
| ≥50                          | 120              | 40     | 80        | 0.74 ± 0.05          | 0.83 ± 0.04                       |
| <b>Breast density rating</b> |                  |        |           |                      |                                   |
| Fatty (A+B)                  | 99               | 41     | 58        | 0.79 ± 0.05          | 0.86 ± 0.04                       |
| Dense (C+D)                  | 83               | 35     | 48        | 0.78 ± 0.05          | 0.84 ± 0.04                       |

Note.—BI-RADS = Breast Imaging Reporting and Data System, AUC = Area Under the Curve.
